# Supplementary material for: Aqueous Strippable Polymer Coating for Highly Efficient Primary Radioactive Uranium Decontamination with Versatility on Diversified Surface
Source: MDPI journal article supplement (doi:10.3390/polym14091656), 2022-04-20
Supplement: s1 [file s1]

Article

# Aqueous Strippable Polymer Coating for Highly Efficient Primary Radioactive Uranium Decontamination with Versatility on Diversified Surface

Yang Xue <sup>1</sup>, Wuxinchen Yang <sup>1,2</sup>, Renliang Yue <sup>1</sup> and Yunfa Chen <sup>1,2,3,\*</sup>

<sup>1</sup> State Key Laboratory of Multi-Phase Complex Systems, Institute of Process Engineering, Chinese Academy of Sciences, Beijing 100190, China; yxue@ipe.ac.cn (Y.X.); ywxc666@163.com (W.Y.); rlyue@ipe.ac.cn (R.Y.)

<sup>2</sup> Center of Materials Science and Optoelectronics Engineering, University of Chinese Academy of Sciences, Beijing 100049, China

<sup>3</sup> Center for Excellence in Regional Atmospheric Environment, Institute of Urban Environment, Chinese Academy of Sciences, Xiamen 361021, China

\* Correspondence: chenylf@ipe.ac.cn; Tel.: +86-10-82544894; Fax: +86-10-82544919

† Address: No.1 Zhongguancun Beiertiao, Haidian District, Beijing 100190, China.

## Figures and tables

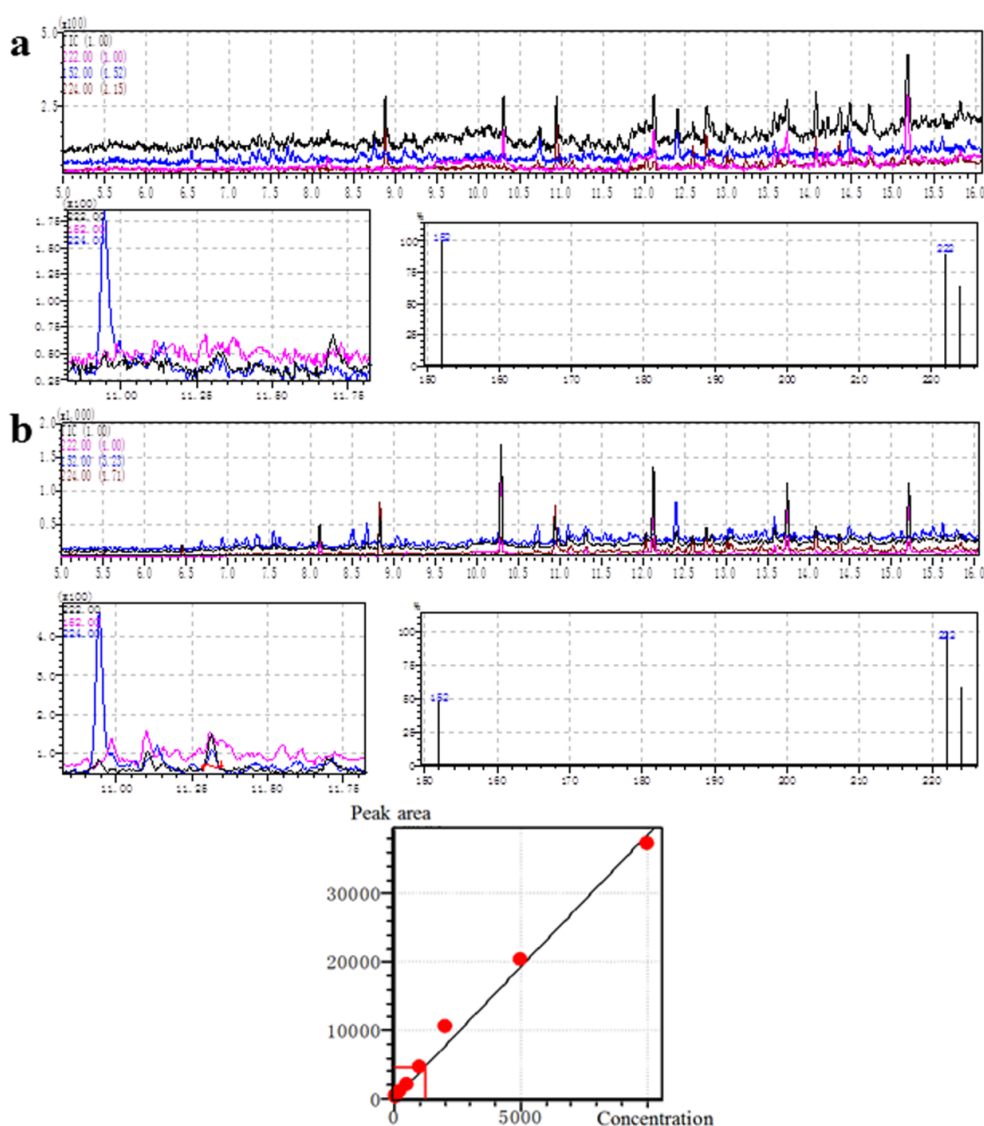

Figure S1. PCB standard curve and TIC curves of PCB detected by GC/MS.

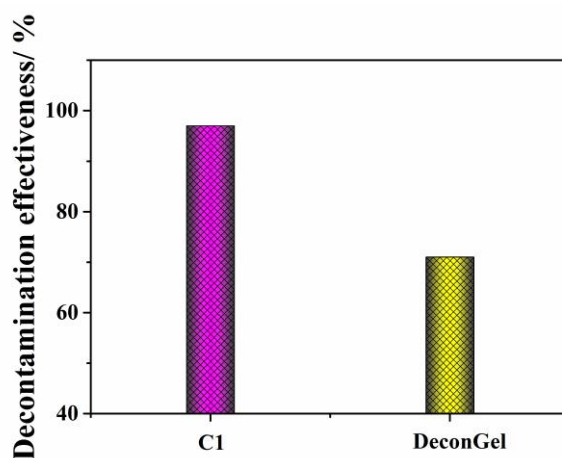

Figure S2. Decontamination effectiveness of polymeric coating C1 and DeconGel 1101

Table S1. Decontamination effectiveness of PCBs detected by GC/MS

| Sam-<br>ple | Contaminated level before decontamina-<br>tion/ppb | Contaminated level after decontamina-<br>tion/ppb | Decontamination Effi-<br>cacy/% |
|-------------|----------------------------------------------------|---------------------------------------------------|---------------------------------|
|             | contaminated level                                 | contaminated level                                |                                 |
| C1          | 1208.81                                            | 0.00                                              | 100.0                           |
| C2          | 1208.81                                            | 131.34                                            | 89.3                            |

Table S2. Repeatability of decontamination efficiency of polymeric coating C1 (1 g/L).

| Sam-<br>ple | Contaminated level before decontamina-<br>tion/Bq cm <sup>-2</sup> | Contaminated level after decontamina-<br>tion/Bq cm <sup>-2</sup> | Decontamination Effi-<br>cacy/% |
|-------------|--------------------------------------------------------------------|-------------------------------------------------------------------|---------------------------------|
|             | contaminated level                                                 | contaminated level                                                |                                 |
| 1           | 0.89                                                               | 0.02                                                              | 97.8                            |
| 2           | 0.97                                                               | 0.01                                                              | 99.0                            |
| 3           | 0.91                                                               | 0.04                                                              | 95.6                            |
| 4           | 0.96                                                               | 0.02                                                              | 97.9                            |
| 5           | 0.89                                                               | 0.04                                                              | 95.5                            |

Table S3. Decontamination properties of C1 and decongel 1101 for high uranium level of 5 g/L and 25 g/L.

| Sample   | concentration<br>of un-<br>anium/g/L | Contaminated level before decon-<br>tamination/Bq cm <sup>-2</sup> | Contaminated level after decontami-<br>nation/Bq cm <sup>-2</sup> | Decontamina-<br>tion Efficacy/% |
|----------|--------------------------------------|--------------------------------------------------------------------|-------------------------------------------------------------------|---------------------------------|
|          |                                      | contaminated level                                                 | contaminated level                                                |                                 |
| C1       | 5                                    | 4.70                                                               | 0.60                                                              | 87.2±0.4                        |
| -1st     | 22.5                                 | 12.05                                                              | 0.54                                                              | 95.5±0.3                        |
| Decongel | 5                                    | 4.41                                                               | 1.47                                                              | 66.7±0.6                        |
| -1st     | 22.5                                 | 14.20                                                              | 4.47                                                              | 68.5±0.6                        |
| C1       | 5                                    | 4.70                                                               | 0.21                                                              | 95.5±1.7                        |
| -2nd     | 22.5                                 | 12.05                                                              | 0.09                                                              | 99.3±0.1                        |
| Decongel | 5                                    | 4.41                                                               | 0.26                                                              | 94.1±0.3                        |
| -2nd     | 22.5                                 | 14.20                                                              | 0.75                                                              | 94.7±0.1                        |

**Table S4.** Decontamination efficiency of polymeric coating C1 applied on different surfaces.

| Surface   | Contaminated level before decontamination/Bq cm <sup>-2</sup> | Contaminated level after decontamination/Bq cm <sup>-2</sup> | Decontamination Efficiency/% |
|-----------|---------------------------------------------------------------|--------------------------------------------------------------|------------------------------|
|           | contaminated level                                            | contaminated level                                           |                              |
| ceramic   | 0.60                                                          | 0.02                                                         | 96.7±1.6                     |
| aluminum  | 0.94                                                          | 0.05                                                         | 94.7±1.2                     |
| lacquered | 1.01                                                          | 0.06                                                         | 94.1±1.3                     |
| glass     | 0.72                                                          | 0.16                                                         | 77.8±1.5                     |
| plastic   | 0.63                                                          | 0.07                                                         | 88.9±1.3                     |

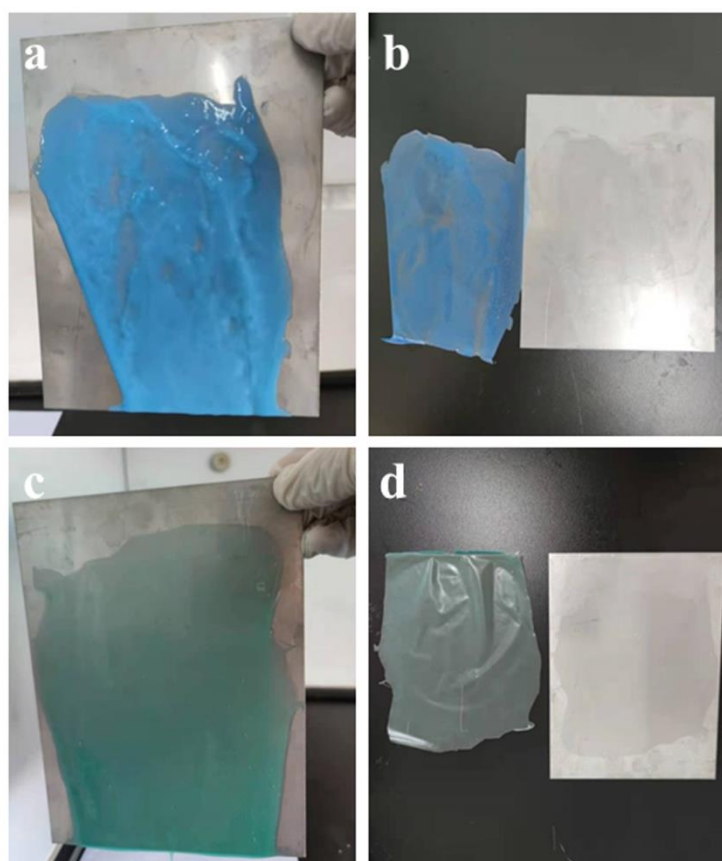**Figure S3.** Photographs of decontamination for vertically placed: (a) (b) C1 and (c) (d) decongel.**Table S5.** Repeatability of tensile strength tests for polymeric coating C1 and DeconGel.

| Sample | Tensile strength/Mpa |          | Elongation at break/% |          |
|--------|----------------------|----------|-----------------------|----------|
|        | C1                   | Decongel | C1                    | Decongel |
| 1      | 36.4                 | 33.3     | 329                   | 236      |
| 2      | 36.8                 | 32.7     | 339                   | 237      |
| 3      | 35.1                 | 34.3     | 299                   | 229      |
| 4      | 35.4                 | 28.1     | 302                   | 164      |
| 5      | 34.9                 | 33.6     | 308                   | 234      |
